## Pyramidal cell types drive functionally distinct cortical activity patterns during decision-making

Simon Musall<sup>1,2,7</sup>, Xiaonan R. Sun<sup>3,4,7</sup>, Hemanth Mohan<sup>3,5</sup>, Xu An<sup>3,5</sup>, Steven Gluf<sup>3</sup>, Anne K. Churchland<sup>3,6</sup>

<sup>1</sup>Institute of Biological Information Processing (IBI-3), Forschungszentrum Jülich, Jülich, Germany

<sup>2</sup>Department of Neurophysiology, Institute of Biology 2, RWTH Aachen University, Aachen, Germany

<sup>3</sup>Cold Spring Harbor Laboratory, Neuroscience, Cold Spring Harbor, NY, USA

<sup>4</sup>Department of Neurosurgery, Zucker School of Medicine, Hofstra University, Hempstead, NY, USA

<sup>5</sup>Department of Neurobiology, Duke University Medical Center, Durham, NC

<sup>6</sup>Department of Neurobiology, University of California, Los Angeles, Los Angeles, CA, USA.

<sup>7</sup>These authors contributed equally

### Abstract

To understand how cortical circuits generate complex behavior, it is crucial to investigate the cell types that comprise them. Functional differences across pyramidal neuron (PyN) types have been observed in sensory and frontal cortex, but it is not known whether these differences are the rule across all cortical areas or if different PyN types mostly follow the same cortex-wide dynamics. We used genetic and retrograde labeling to target pyramidal tract (PT), intratelencephalic (IT) and corticostriatal projection neurons and measured their cortex-wide activity. Each PyN type drove unique neural dynamics at a cortex-wide and within-area scale. Cortical activity and optogenetic inactivation during an auditory discrimination task also revealed distinct functional roles: all PyNs in parietal cortex were recruited during sensory stimulation but, surprisingly, PT neurons were most important for perception. In frontal cortex, all PyNs were required for accurate choices but showed distinct choice-tuning. Our results reveal that rich, cell-type-specific cortical dynamics shape perceptual decisions.

### Introduction

The neocortex is organized into discrete layers that form a vertically-arranged microcircuit motif. This core circuit is largely conserved across cortical areas with each layer consisting of distinct excitatory and inhibitory cell types that can be categorized based on genetic markers, cell morphology, anatomical projections or developmental lineage<sup>1</sup>. The precise interplay between these cell types is crucial for accurate cortical circuit function and their respective functional roles are the subject of intense study. Tremendous progress has been made particularly for cortical interneurons, where the availability of specific mouse driver lines has revealed the functional arrangement of inhibitory circuit motifs<sup>2-4</sup>, e.g. for network synchronization<sup>5-7</sup> and state-dependent sensory processing<sup>8-11</sup>. However, the roles of glutamatergic pyramidal neuron (PyN) types are less well established, although PyNs comprise ~80% all cortical neurons and form almost all long-range projections that enable the communication between local cortical circuits and other brain areas.

While PyNs are still often treated as a monolithic group, PyN types appear to be far more diverse than interneurons with at least one hundred putative types indicated by RNA sequencing<sup>12</sup>. These molecular signatures are critical for categorizing PyNs and go far beyond layer identity because different PyN types are often intermingled within layers<sup>13-17</sup>. PyNs can also be classified based on their projection target. Long-range projection neurons are broadly categorized into two major types: intratelencephalic (IT) neurons, projecting to other cortical structures and the striatum, and

pyramidal tract (PT) neurons, projecting to subcortical structures, such as the superior colliculus (SC), thalamus, the pons and the striatum. Aside from long-range projection targets, PT and IT neurons also differ in their electrophysiological properties, dendritic morphology and local connectivity, and differentially respond to sensory stimulation<sup>15–17</sup>. Recent studies in sensory cortex also showed that only PT but not IT neurons are important for active perception of tactile or visual stimuli, suggesting that PT and IT neurons encode separate streams of information<sup>18,19</sup>. Similar results have been found in secondary motor cortex (M2), where specific PT neurons are involved in motor generation<sup>13,20</sup>. This suggests that the functional divergence of PyN types could be key for understanding cortical microcircuits, with PT and IT neurons forming functionally-distinct, parallel subnetworks that independently process different information. However, the functional tuning of individual PyNs in frontal cortex is still best predicted by cortical area location instead of laminar location or projection type<sup>21</sup>. Since PyN type function has only been studied in single areas, it is therefore not known whether PyN-specific subcircuits are the rule throughout the cortex or restricted to a subset of cortical regions.

An ideal method to address this question is widefield calcium imaging, which allows measuring neural activity across the dorsal cortex with cell-type specificity<sup>22–24</sup>. Indeed, interneuron-specific widefield imaging has already revealed clear differences in the spatiotemporal dynamics of different inhibitory cell types during an odor detection task<sup>25</sup>. However, cortex-wide studies of different PyN types are lacking, in part due to the limited availability of PyN-specific driver lines<sup>26–28</sup>. Here, we used two novel knock-in mouse driver lines for PT and IT neurons<sup>26</sup> and performed widefield imaging to measure PyN-type-specific activity while animals performed a perceptual decision-making task. Moreover, we developed a retrograde labeling approach to selectively measure the activity of corticostriatal projection (CStr) neurons throughout the dorsal cortex. Dimensionality-reduction and clustering analyses revealed that cortex-wide dynamics were clearly distinct for each PyN type, suggesting the existence of specialized subcircuits. Cortical dynamics of different PyNs were further segregated based on their role in decision-making, with encoder and decoder approaches revealing the strongest stimulus- and choice-related modulation in sensory, parietal and frontal cortices. This was confirmed by PyN-type-specific inactivation experiments. In parietal cortex, PT neurons were most important for sensory processing while all PyN types in frontal cortex were needed for choice formation and retention. Taken together, our results demonstrate that different PyN-types exhibit functionally distinct, cortex-wide neural dynamics with separate roles during perceptual decision-making.

## Results

To monitor PyN-type specific neural activity throughout the dorsal cortex, we used two knock-in inducible CreER lines that target developmentally-distinct classes of excitatory cortical neurons: *Fezf2*-CreER targeting PT neurons and *PlexinD1*-CreER targeting IT neurons<sup>26</sup>. For PyN-type specific GCaMP6s expression, both lines were crossed with the *Ai162* reporter line<sup>29</sup> and CreER activity was induced at four weeks of age. In each mouse line, GCaMP expression was restricted to specific cortical layers and PyN types (Fig 1a,b). In *Fezf2* mice, expression was concentrated in layer 5b (Fig. 1a). We observed axonal projections to multiple subcortical regions, such as striatum and the corticospinal tract, confirming that *Fezf2* is a reliable marker for corticofugal PT neurons. In *PlexinD1* mice, GCaMP expression was restricted to layer 2/3 and layer 5a and axonal projections were visible in the corpus callosum and the striatum (Fig. 1b). These results are in agreement with earlier reports<sup>26</sup>, confirming that *PlexinD1* is a reliable marker for intracortical and corticostriatal IT neurons.

After confirming non-overlapping expression patterns of PT and IT neurons, we measured cell-type specific cortical activity with widefield calcium imaging. All imaging data was aligned to

the Allen Common Coordinate Framework v3 (CCF)<sup>25,30</sup> to compare activity across individuals and PyN types. Both lines yielded robust GCaMP-dependent fluorescence and we observed rich neural dynamics throughout the dorsal cortex (Supp. Movies 1-3). We first used retinotopic mapping to assess sensory responses of different cell types and the resulting spatial arrangement of visual areas. Both PT and IT neurons robustly responded to visual stimulation and we could construct retinotopic maps that reliably indicated the location of known visual areas (Fig. 1c)<sup>31</sup>. Retinotopic maps were similar to those observed in an *Emx-Cre-Ai93* mouse line (EMX) that expressed *GCaMP6f* in all excitatory cortical neurons<sup>32</sup>, suggesting that the functional architecture of visual areas is comparable across PyN types. However, clear differences were apparent in the modulation of cortical regions in the absence of visual stimulation. For example, the total variance of cortex-wide activity was largest in parietal and frontal regions in PT neurons (Fig. 1d, left) while variance was highest in visual and somatosensory regions of IT neurons (Fig. 1d, center). This was comparable to variance in EMX mice, which showed additional modulation in retrosplenial (RS) cortex (Fig. 1d, right). These different patterns were also highly consistent across individual mice (Supp. Fig. 1).

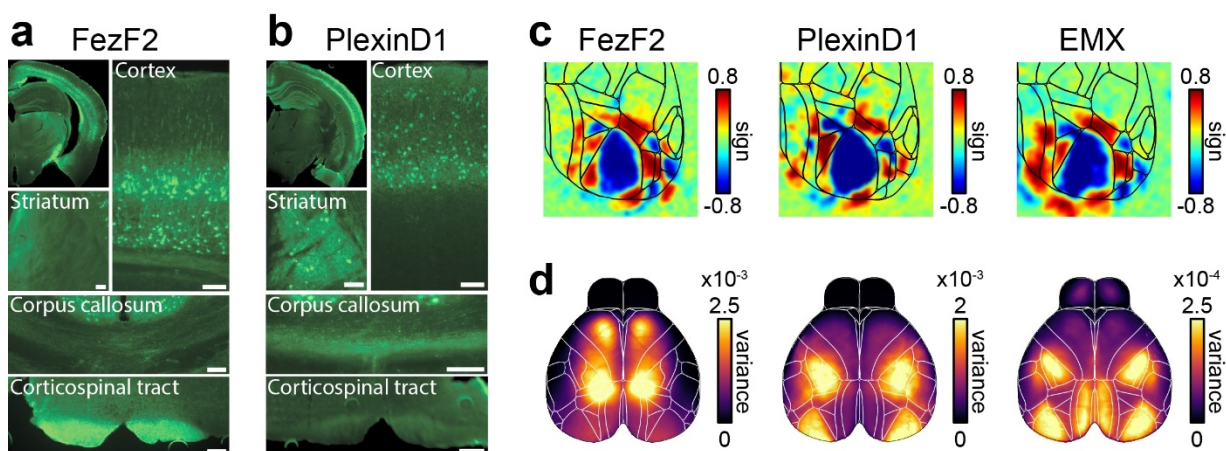

**Figure 1. Knock-in mouse lines allow a PyN-type-specific view of cortex-wide neural activity.**

**a)** GCaMP6s-expression in *Fezf2-CreER-Ai162* mice was widespread throughout the dorsal cortex, and largely confined to deeper layer 5b. Axonal projections were found in multiple subcortical targets, such as the striatum, and the corticospinal tract. Scale bars are 100  $\mu\text{m}$ . **b)** GCaMP6s-expression in *PlexinD1-CreER-Ai162* mice was widespread throughout the cortex and restricted to superficial layers 2/3 and layer 5a. Subcortical axonal projections were found in striatum and corpus callosum but not the corticospinal tract. **c)** Visual sign maps from retinotopic mapping experiments. Both PyN types showed clear retinotopic responses in primary and secondary visual areas. Area outlines largely resembled known area outlines that were also observed in nonspecific EMX mice. **d)** Total variance maps, showing most modulated cortical regions in each PyN type.

The observed differences in variance could indicate general differences in the spatiotemporal dynamics of cortex-wide activity across PyN types. To better capture such differences in cortex-wide activity, we performed semi-nonnegative matrix factorization (sNMF). This analysis captures the majority (at least 99%) of the variance by reducing the imaging data to a small number of spatial- and temporal components<sup>23,33</sup>. Here, two factors could point to PyN-specific differences in cortex-wide activity: the number of required components, capturing the overall complexity of cortical dynamics in each PyN type, and the pattern of the recovered spatial components, capturing the correlation structure between cortical areas.

The number of components was similar for EMX and IT mice but far fewer components were needed for PT mice (Fig. 2a), suggesting that PT dynamics are less diverse than other PyN types. Correspondingly, PT neurons were also the most correlated across cortical regions (Supp. Fig. 2). We then compared the patterns of spatial components from each PyN type. Because spatial



sNMF components are strictly positive, each component can be seen as a map of positively correlated cortical areas and we wondered whether these cortex-wide correlation patterns would differ between PyN types. We therefore performed a UMAP projection of the first 20 components from all recordings and PyN types, non-linearly embedding the pixels of each component in a 2-dimensional space (Fig. 2b)<sup>34</sup>. If neural activity in PT, IT and EMX mice tended to exhibit similar correlation patterns, these spatial components would be mixed together. Instead, we found that components formed clusters that were largely dominated by either PT or IT neurons (green/blue dots). EMX neurons formed a third set of non-overlapping clusters, likely reflecting the combined cortical dynamics from the diverse PyN types in this larger group (red dots). A simple classifier could reliably identify each group with high accuracy based on the nearest UMAP neighbors from other animals, even when the classification was based on just a single spatial component (Fig. 2c). These results clearly demonstrate that PyN types differ in the complexity of cortical dynamics and also exhibit largely unique cortex-wide correlation patterns.

A potential reason why cortex-wide correlation patterns are unique to each PyN type is that each type could show particularly distinct activity in specific cortical areas. This could lead to correlation patterns that are either dominated by highly active areas or where inactive areas are ‘missing’. In this case, the relatively low dimensionality of PT neurons might also be due to a lower number of active cortical areas. We therefore used a localized form of sNMF (LocaNMF)<sup>33</sup> which obtains spatial components that are dense and spatially restricted to a specific cortical “seed” region. This results in more interpretable spatial components which resemble functionally-defined cortical areas (Fig. 2d). We then isolated these localized activity patterns for each cell-type and again compared the number of components required to explain at least 99% of the variance. As expected, the required number of components was higher than with sNMF and, interestingly, was also more comparable across cell-types (Fig. 2e). This shows that cell-type specific differences in cortex-wide correlation patterns are not due to a lack of activity in some cortical areas (which would have resulted in a lower number of required components, e.g. in PT mice) but PyN-type specific differences in the coordinated activation of multi-area cortical networks.

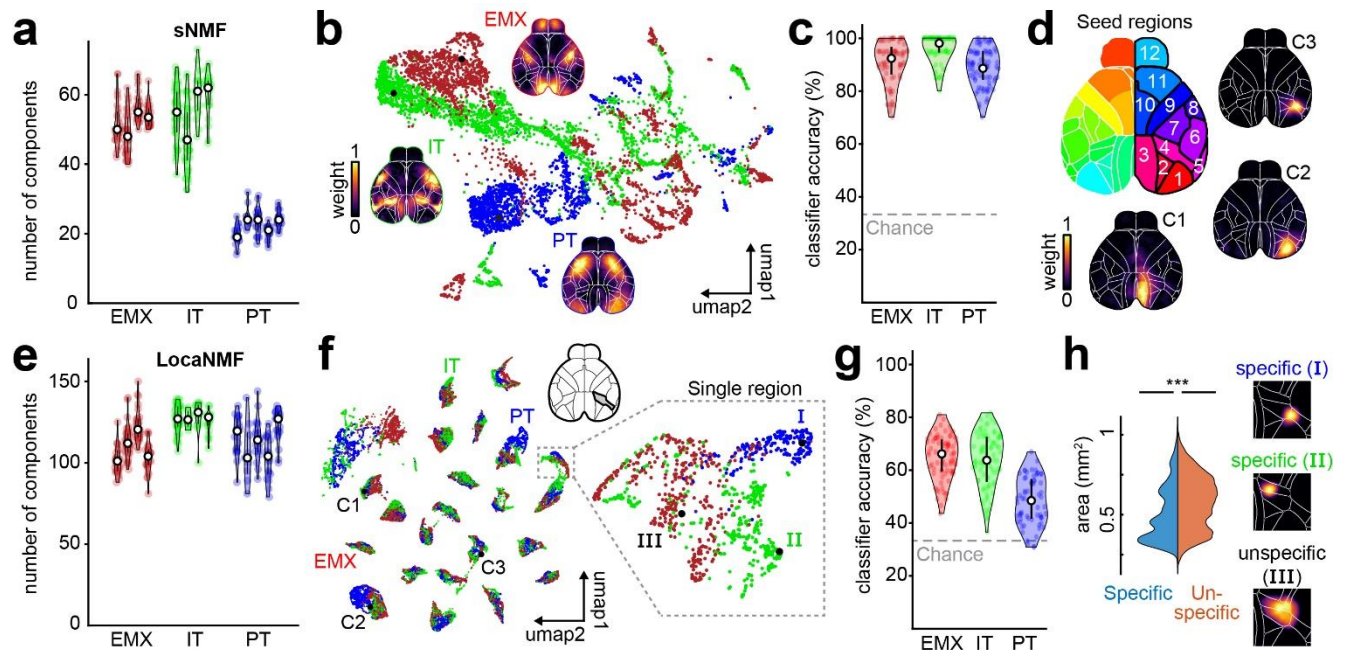

**Figure 2. PyN types exhibit unique cortical activity patterns.**

**a)** Number of sNMF components, accounting for 99% of cortical variance in each PyN type. Violin plots show individual mice in each group, dots represent individual sessions. **b)** UMAP embedding of spatial sNMF components for EMX (red), IT (green) and PT (blue) mice. Maps show example spatial components of each type, black dots show their respective UMAP locations. **c)** Accuracy of a PyN type classifier, based on neighbor identity of individual components in UMAP space. Each data point represents one session. **d)** Top left: Map of seed regions, used for LocaNMF analysis. Example spatial components (C1-C3) are compact and mostly confined to each seed region. **e)** Number of LocaNMF components, accounting for 99% of cortical variance in each PyN type. Conventions as in (a). **f)** UMAP projection embedding of spatial LocaNMF components. Conventions as in (b). Left: UMAP shows clustering of LocaNMF components from similar regions. Right: Components within individual regions are further divided for different PyN types. Black dots show UMAP location of example components, shown in (h). **g)** Accuracy of a PyN type classifier, based on individual LocaNMF components. Conventions as in (c). **h)** Left: Peak normalized distributions of area size for PyN-type-specific (blue) versus unspecific (red) LocaNMF components. Specific components are smaller than unspecific components (specific: median = 0.49 mm<sup>2</sup>, n = 4370 components, unspecific: median = 0.6mm<sup>2</sup>, n = 10978 components; ranksum test:  $p < 10^{-10}$ ). Right: Examples of specific (I, II) and unspecific (III) components in right parietal cortex.

Repeating the UMAP embedding on these local components also uncovered PyN-type-specific clustering (Fig. 2f), which could be used to accurately identify each PyN type (Fig. 2g). This could either be due to the presence of specific ‘subregions’, where PyN types are most active in smaller parts of a given cortical area, or larger ‘superregions’, where the activity of a specific PyN type extends across known area borders. We therefore compared the size of PyN-type-specific versus nonspecific components. Interestingly, specific clusters were significantly smaller as unspecific clusters (Fig. 2h), suggesting that different PyNs might be most active in distinct subregions instead of larger multi-area components. This indicates that smaller, PyN-specific subregions may reside within the coarser, traditionally-defined cortical areas.

We next sought to determine how cortical dynamics of different PyN types are related to decision-making. We therefore examined task-related activity for each PyN type in an auditory decision-making task (Fig. 3a)<sup>35</sup>. Mice initiated trials by touching small handles, which triggered the simultaneous presentation of sequences of clicking sounds to their left and right side. After a delay period, mice reported their decision by licking one of two water spouts and were rewarded for choosing the side where more clicks were presented. To reduce temporal correlations between task events, such as trial initiation and stimulus onset, the duration of the initiation, stimulus and delay periods were randomly varied across trials. In all mice, decisions varied systematically with stimulus strength (Fig. 3b) and were equally affected by click sounds throughout the stimulus period (Supp. Fig. 3).

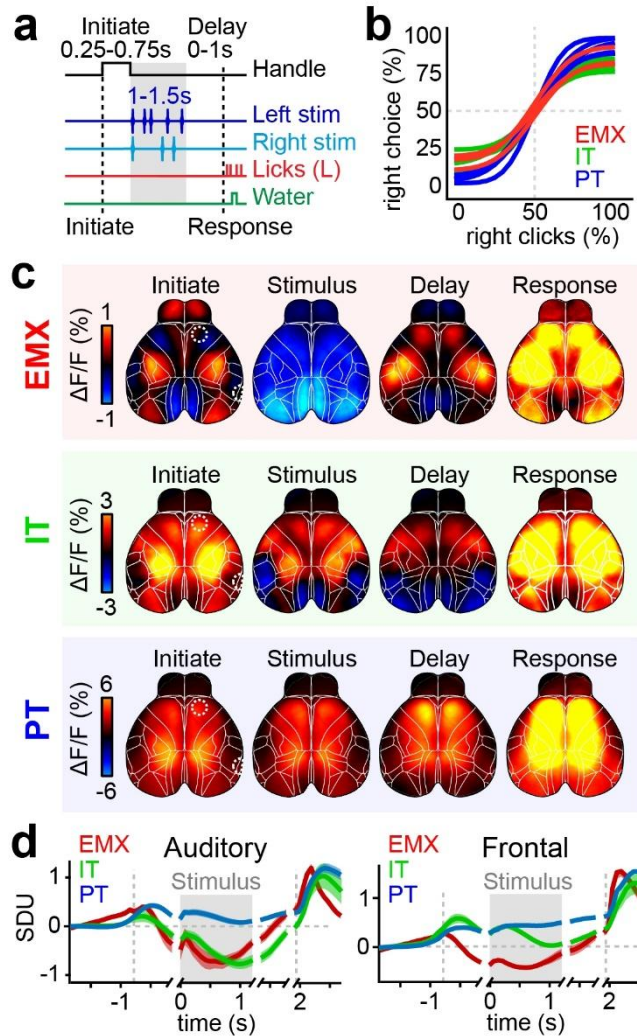

**Figure 3. An auditory decision-making task reveals distinct functional activity patterns in each PyN type.**

**a)** Single-trial schematic of the auditory discrimination task. Mice touched handles to initiate randomized click sequences on the left and right side. After a delay period, a lick response on the correct side was rewarded with water. The episode duration was randomly varied in individual trials. **b)** Psychometric functions fit to behavioral data from the discrimination task in (a) of individual EMX (red), IT (green) and PT (blue) mice. **c)** Trial-averaged response maps for all correct, leftward trials in different PyN types. Shown are averages for the ‘Initiation’, ‘Stimulus’, ‘Delay’ and ‘Response’ periods shown in (a). **d)** Averaged activity in auditory (left) and frontal cortex (right) for each PyN type. Averages were separately aligned to each of the four trial periods, indicated by short gaps. Left dashed line: time of initiation, the gray box: stimulus presentation, right dashed line: the animal’s response. Traces show standard deviation units (SDU). White dashed circles in (c) show respective area locations. Colors as in (b). Shading shows s.e.m.; n = 4 EMX/IT mice and 5 PT mice.

In all PyNs, we observed broad recruitment of cortical structures, especially in parietal and frontal regions, with the highest activity during the response period (Fig. 3c). A clear difference between PyN types occurred during the stimulus period. Here, cortical activity was uniformly suppressed in EMX mice, partially suppressed in IT mice, and uniformly increased in PT mice (Fig. 3d). During all periods, most activity in all three cell types was largely symmetric across the left and right hemispheres, even when only analyzing trials where stimuli were presented on the left side and the animal made a corresponding leftward choice (Fig. 3c,d). Moreover, responses to sensory stimuli were much weaker than to movement-related events, such as trial initiation or the response (Fig. 3d, gray bar versus dashed lines). A potential explanation is that lateralized, task-related activity is obscured by cortical activity due to animal movements<sup>32,36–38</sup>.



To isolate task-related activity from movements we used a linear encoding model that we recently developed<sup>32</sup>. The model predicts single-trial fluctuations in cortical activity by combining task variables, such as stimulus and choice, with movement variables, such as handle touch and licking. All variables are combined into a single design matrix; we used ridge regression to fit the model to the imaging data. We then computed the tenfold cross-validated  $R^2$  ( $cvR^2$ ), to assess how well the model captured cortical activity. For all PyN types, the model successfully captured a large fraction of single-trial variance throughout the cortex (Fig. 4a). Predicted variance was higher in IT and PT mice compared to EMX mice, with over 90% explained variance in frontal cortex of PT mice. Consistent with earlier results, a large fraction of the model's predictive power was explained by movements, which consistently captured more variance than task variables (Fig. 4b). To isolate the unique contributions of movement or task variables, we also computed the loss in predicted variance ( $\Delta R^2$ ) when removing either set of variables from the full model. This allowed us to separately examine their respective impact on cortex-wide activity by determining, for each PyN type, where in the cortex predictive power was lost (Fig. 4c). For movements, we observed a comparable pattern across PyN types with the highest unique contributions in primary somatosensory and motor areas (Fig. 4c, top row). In contrast, the overall pattern for task variables differed across PyN types:  $\Delta R^2$  was highest in frontal cortex of EMX and PT mice, but more diffuse in IT mice with the highest  $\Delta R^2$  in auditory cortex (Fig. 4c, bottom row). Examination of specific task variables further suggested distinct roles for each PyN type (Fig. 4d). Here, the 'choice' variable had the highest contributions in PT neurons but was overall weaker in IT neurons. Conversely, contributions from other task variables were higher in IT neurons. This dichotomy was not observed in EMX neurons, indicating that IT and PT neurons might have different functional roles that cannot be resolved without PyN-type specific measurements.

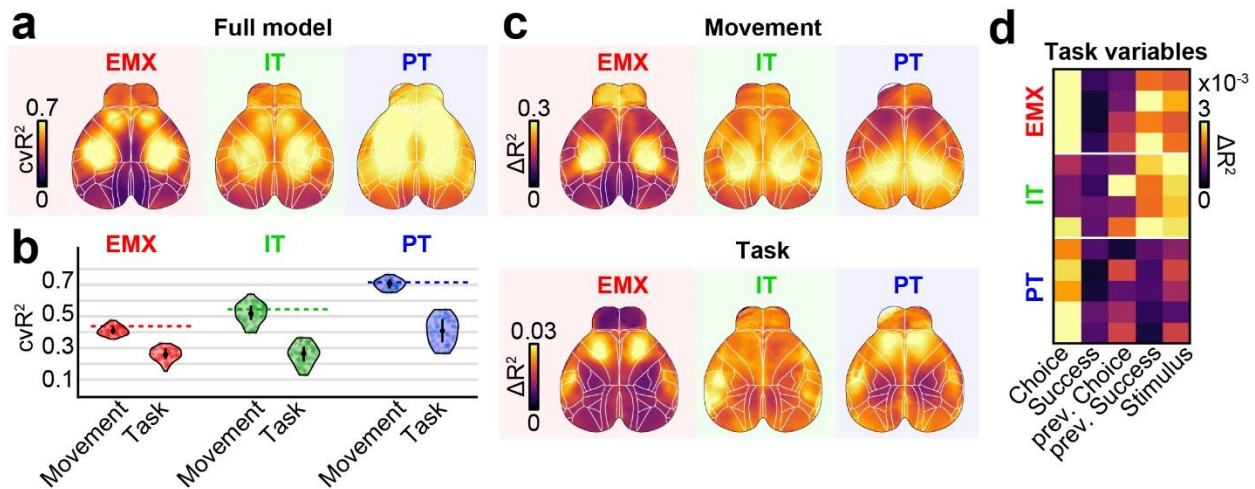

**Figure 4. An encoding model uncovers task-specific differences across PyN types.**

**a)** Average maps of  $cvR^2$  for different PyN types. The model accurately predicted cortical variance for all PyNs. **b)**  $cvR^2$  from two models, using only movement ('Movement') or task variables ('Task'). In all groups, movements were more predictive than task variables and accounted for the majority of the full models explained variance (dashed lines). Circles denote sessions. **c)** Average maps of  $\Delta R^2$  for different PyN types. Top row shows  $\Delta R^2$  for movements, the bottom  $\Delta R^2$  for task variables. Colors are scaled differently in each row. **d)**  $\Delta R^2$  for different task variables and PyN types, averaged over all pixels. Rows show individual mice.

To gain insight into the cortical dynamics related to stimulus and choice, we examined the event kernels learned by the model for each PyN type (see methods). Each event kernel represents the isolated time-resolved cortical response to a different task variable that is corrected for potentially confounding factors, such as movements, since those are captured by other model variables. First, we focused on responses to the auditory stimulus. In contrast to raw trial

averages (Fig. 3c), the stimulus kernels in EMX mice revealed clear sensory-locked responses in auditory, parietal and frontal cortex (Fig. 5a, top). Other areas, such as somatosensory and visual cortex, were inhibited. Sensory-locked responses were also present in sensory, parietal and frontal cortex of PT and IT mice (Fig. 5a, center and bottom). However, the cortex-wide response patterns were not identical, for instance, no inhibition was apparent in PT mice. Sensory responses were particularly distinct in parietal cortex. Responses in EMX and IT mice were more anterolateral in parietal area A while PT responses were surprisingly prominent and more posteromedial at the border between area AM and RS (Fig. 5a,b).

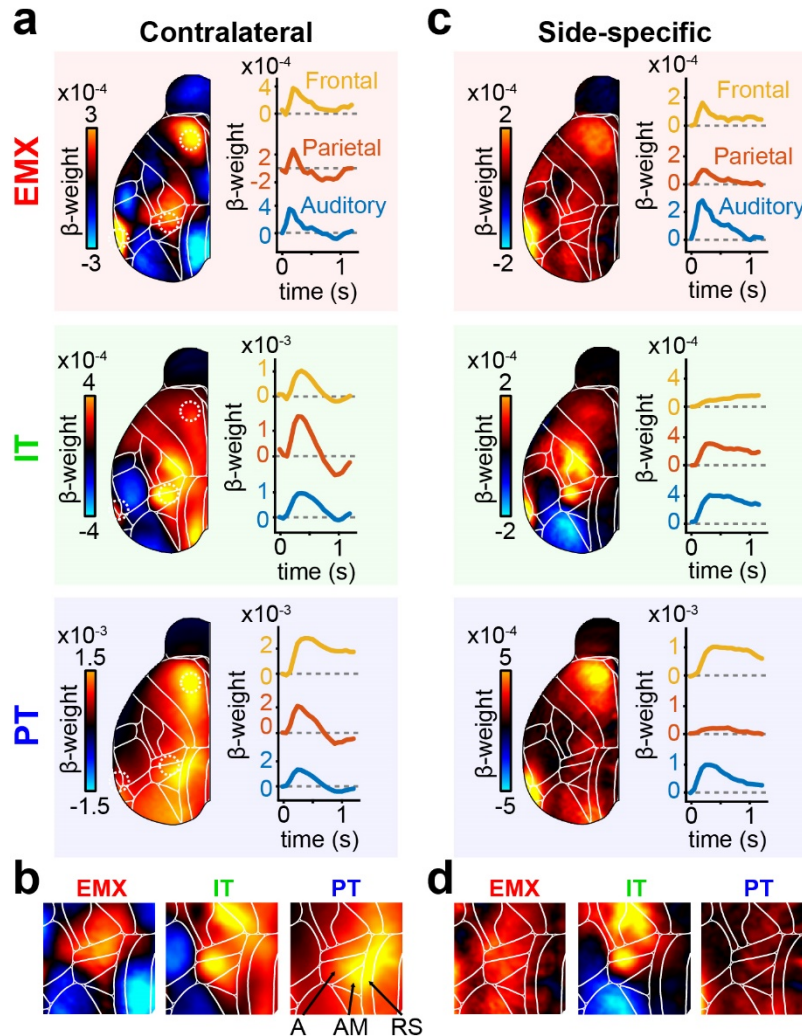

**Figure 5. PyN-specific differences are evident in the location and specificity of cortical stimulus responses.** **a**) Left: Response kernels for contralateral stimuli over all EMX (red), IT (green), and PT mice (blue), averaged between 0 and 200 ms. Right: Stimulus-evoked activity in auditory (blue), parietal (red), and frontal cortex (yellow). Dashed circles in the left stimulus maps show locations of respective cortical areas. **b**) Magnified view on parietal regions of the stimulus maps in (a). PyNs differed in the location of sensory responses. Arrows show location of parietal areas A, AM and the RS. **c**) Side-specific stimulus responses, computed as the difference between contra- and ipsilateral stimulus kernels. Conventions as in (a). **d**) Magnified view on parietal regions of side-specific maps in (c). IT neurons show clear, side-specific responses that were weaker in EMX and absent for PT neurons.

We found additional differences across PyN types in the spatial specificity of sensory responses. That is, how selectively cortical areas in each hemisphere responded to a stimulus on the contra- but not the ipsilateral side. To assess such side-specificity, we computed the difference between the contra- and ipsilateral stimulus kernels (Fig. 5c, colors indicate regions for which responses differed for contra- versus ipsilateral stimulus kernels). In EMX mice, we found side-specific



responses in auditory, frontal, and to a lesser extent, parietal cortex (Fig. 5c,d). IT mice showed side-specific responses in auditory and parietal but not frontal cortex. In contrast, PT mice showed clear side-specific responses in auditory and frontal but not in parietal cortex. PT and IT neurons therefore not only differ in the cortical location of sensory responses but also in the degree of side-specificity in parietal and frontal cortex.

Having identified PyN-type dependent activity for sensory stimuli, we then examined choice-dependent activity and again observed differences across PyN types. In EMX mice, a number of regions showed choice-related activity, particularly in the frontal cortex, while sensory and parietal regions were only weakly modulated (Fig. 6a). We also found choice signals in somatosensory areas of the whiskers and nose that slowly increased over the course of the trial, even before the stimulus onset (Supp. Fig. 4a). In contrast, choice-specific activity in frontal cortex strongly increased after stimulus onset and remained elevated as the decision progressed from sampling the stimulus to the subsequent delay period (Fig. 6a, yellow trace). We found equally prominent choice signals in frontal cortex of PT mice while very little modulation was seen in IT mice (Fig. 6b, Supp. Fig. 4b,c). In EMX and PT mice, positive signals for contralateral choices were concentrated in the medial part of secondary motor cortex (M2) while parts of the primary motor cortex (M1) were inhibited. This could indicate accumulation of sensory evidence and motor preparation in M2 while inhibiting parts of M1 to prevent early lick responses<sup>39</sup>.

Although the choice kernels revealed differences between PyN types, choice-related activity only accounted for a small amount of the total neural variance (Fig. 4). Since the encoding model is designed to capture as much variance as possible, we wondered if this approach might miss subtle choice signals that are specific but low in magnitude. The encoding model's ridge penalty also enforces choice-related variance to be distributed over all correlated model variables, which could 'diffuse' weaker choice-related activity from the choice to other model kernels.

To selectively isolate all choice-related activity, we therefore built a decoding model, using a logistic regression choice classifier with L1 penalty (see Methods). In contrast to the encoding model, this decoder approach isolates the cortical signals that are best suited to predict the animal's choices, regardless of their magnitude.

For all PyN types, the decoder predicted the animal's choices with high accuracy, confirming that cortical activity reliably reflects trial-by-trial choices (Supp. Fig. 5a). When analyzing the decoder weights, we found comparable patterns to the encoding model's choice kernels but with much clearer separation of cortical areas (compare top row 'Delay' in Fig. 6c to Fig. 6a, left). For all PyN types, the decoder weights identified choice signals in multiple areas of the anterior cortex that evolved during decisions (Fig. 6c). In EMX and PT mice (top and bottom rows), large parts of M2 were again highly choice predictive, including the anterior lateral motor cortex (ALM) and the medial motor cortex (MM). M2 choice weights strongly increased immediately after stimulus onset and remained elevated during the subsequent delay period (Fig. 6c,d). Surprisingly, we also found a mild suppression of M2 in IT mice. This choice-related inhibition evolved more slowly during the stimulus and delay period (Fig. 6c,d) and was more spatially restricted to ALM (Fig. 6e). In somatosensory cortex, choice signals were again visible throughout the trial (Supp. Fig. 5b) while no clear modulation was seen in parietal cortex (Fig. 6d, left). This is in line with our previous results and suggests that parietal areas are more involved in sensory processing instead of choice formation or motor execution<sup>40,41</sup>.

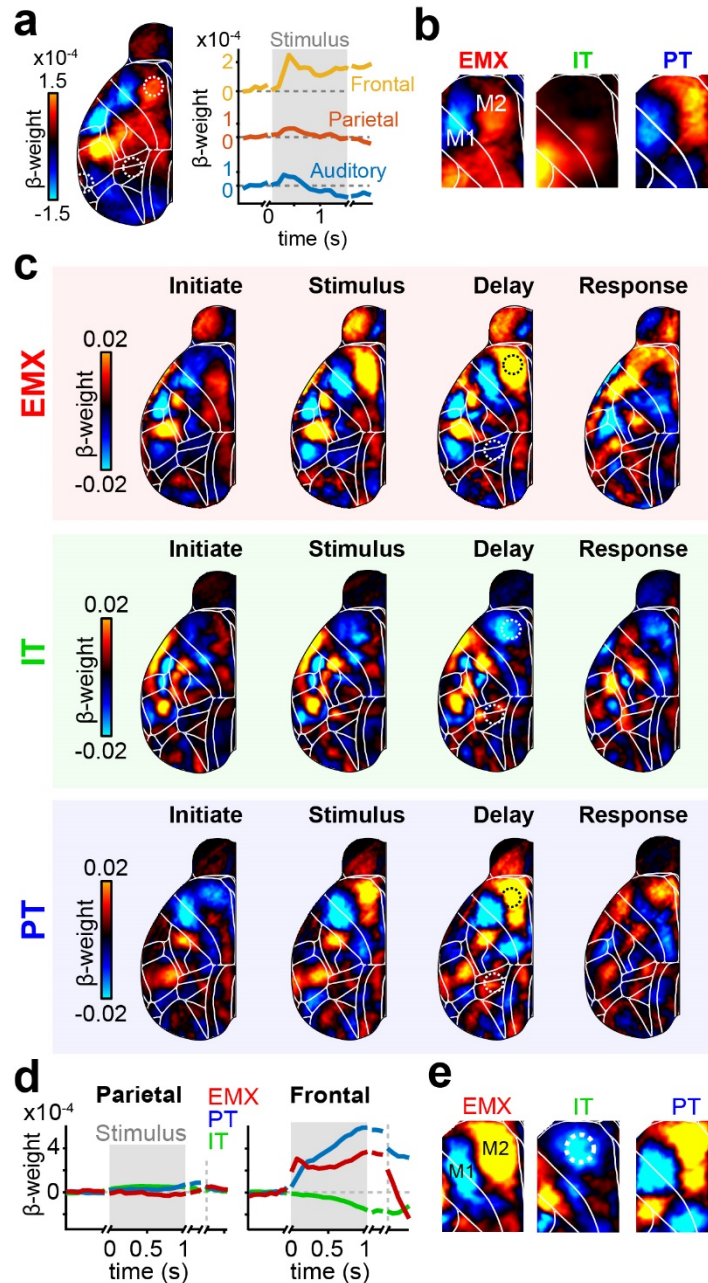

**Figure 6. The temporal dynamics of choice-related activity differ across PyN types.**

**a)** Left: Averaged choice kernels for EMX mice during the delay period. Positive weights indicate increased activity for contralateral choices, negative weights indicate choice-related reduction in activity. Right: Choice-related activity in auditory (blue), parietal (red), and frontal cortex (yellow). Traces are re-aligned to the initiation, stimulus, delay and response periods, indicated by gaps in weight traces. **b)** Zoomed-in map for frontal choice kernels of EMX, IT and PT mice during the delay period. **c)** Cortical maps of contralateral choice weights for different trial episodes. Several areas in anterior cortex showed clear choice signals. **d)** Baseline-corrected decoder weights in parietal (left) and frontal cortex (right) throughout the trial. Conventions as in (a). Dashed circles in the delay maps of (c) show the parietal and frontal locations that were used to compute the traces. **e)** Zoomed-in map for frontal decoder weights of EMX, IT and PT mice during the delay period. Dashed circle shows location of ALM.

The decoding model recovered more finely structured choice maps than the encoding model, especially in frontal cortex (compare Fig. 6e to 6b), revealing strong choice-selective activation of PT neurons and inhibition of IT neurons. The choice-specific suppression of IT neurons was unexpected and we wondered if this was due to the modulation of superficial intracortical projections or, instead, the deeper corticostriatal projecting IT neurons. Earlier work suggested a

lack of choice selectivity in intracortical projection neurons<sup>20,21</sup>, and we thus hypothesized that our results in IT mice were due to corticostriatal (CStr) projecting IT neurons. To address this directly, we developed an intersectional approach that exclusively labels the majority of CStr neurons. This was achieved by performing multiple, bilateral injections of a retrograde CAV2-Cre virus in the striatum of Ai162 reporter mice (Fig. 7a), inducing wide-spread expression of GCaMP6s in CStr neurons throughout the cortex (Fig. 7b). As expected, GCaMP6s expression in CStr neurons was largely confined to layer 5 with some sparse expression in deeper layers. We then used widefield calcium imaging to selectively measure activity from CStr neurons. As with the PT and IT mice, we obtained robust fluorescence signals throughout the dorsal cortex (Supp. Movie 4) and could identify visual areas using retinotopic mapping (Supp. Fig. 6a). sNMF analysis showed that the dimensionality of CStr mice was intermediate between PT and IT mice, and that the spatial components did not strongly overlap with other PyN types (Supp. Fig. 6b,c). This clear difference between IT and CStr mice strongly suggests that imaging signals from IT mice are not solely dominated by deeper IT-positive CStr neurons but represent a combination of superficial intracortical and deeper CStr neurons.

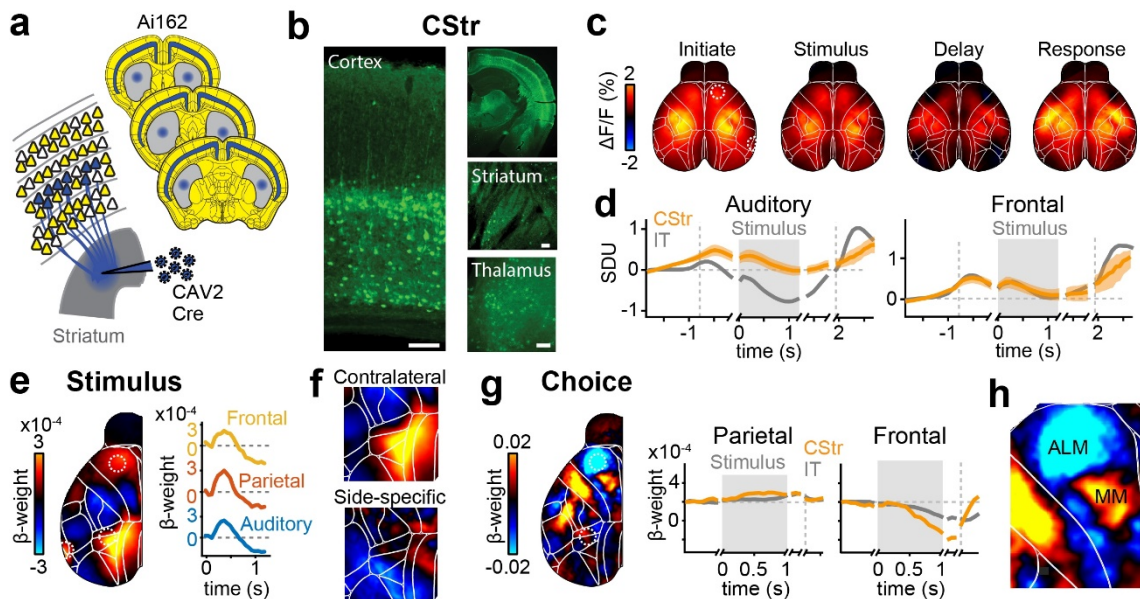

**Figure 7. An intersectional approach to measure cortex-wide activity of CStr neurons.**

**a)** Schematic of the retrograde labeling approach. Multiple bilateral injections of retrograde CAV2-Cre virus in Ai162 mice robustly induced expression of GCaMP6s in CStr neurons. **b)** GCaMP6s-expression was robust throughout the dorsal cortex, and largely confined to layer 5a. Scale bars are 100  $\mu\text{m}$ . **c)** Cortical dynamics of CStr neurons in the auditory discrimination task. Shown are trial-averages over all correct, leftward trials in different trial episodes. No clear lateralization was observed in trial averages. **d)** Averaged activity in auditory (left) and frontal cortex (right) for CStr (orange) and IT (gray) mice. Dashed lines show times of initiation and response periods, gray areas the stimulus period. Traces show standard deviation units (SDU). **e)** Left: Contralateral stimulus kernel (“weight map”), averaged over all CStr mice, between 0 and 200 ms after stimulus onset. Right: Colored traces show changes in sensory (blue), parietal (red) and frontal cortex (yellow). Locations for each area are indicated by dashed circles in the weight map. **f)** Top: Weight map from (e), zoomed in on parietal cortex. Bottom: Difference of contra- versus ipsilateral stimulus kernels. **g)** Left: Cortical weight map from choice decoder during the delay period, averaged over all CStr mice. Right: Baseline-corrected decoder weights in parietal (left) and frontal cortex (right) for CStr (orange) and IT mice (gray). Traces are re-aligned to the initiation, stimulus, delay and response periods, indicated by gaps in weight traces. **h)** Weight map from (g), zoomed in on frontal cortex.

We then trained CStr mice in the auditory discrimination task. Trial-averaged dynamics partially resembled IT mice, for example in frontal cortex, but also showed clear differences, such as a lack of pre-stimulus suppression in sensory cortex (Fig. 7c,d; orange versus gray traces). Differences between CStr and IT mice were also visible in the stimulus kernels from the



encoding model. In CStr mice, stimulus-related activity in parietal cortex was stronger than in sensory and frontal cortex but the activated parietal regions were more medial than in IT mice (Fig. 7e). Interestingly, these stimulus-driven parietal regions (Fig. 7f, left) closely resembled cortical areas that form anatomical and functional connections to the dorsomedial striatum<sup>42,43</sup>. As with PT neurons (Fig. 5b,d), parietal CStr responses equally responded to contra- and ipsilateral stimulation (Fig. 7f, bottom).

To determine whether choice-related inhibition in frontal cortex of IT mice arises from CStr neurons, we then repeated the choice decoder analysis. The decoder predicted animals' choices with similarly high accuracy as for PT and IT mice (Supp. Fig. 6d). We then extracted choice weights for each task episode. Here, CStr activity was overall similar to that of IT mice, with even stronger inhibition in frontal cortex that started after stimulus onset and lasted throughout the delay and response period (Fig. 7g, right). As in IT mice, choice-specific inhibition was prominent in area ALM but did not extend to MM. Choice-specific inhibition thus occurs specifically in CStr neurons in ALM and likely explains similar results in IT mice.

The observed differences between PyN types suggest that these types may drive distinct aspects of decision-making. To causally test the functional role of different PyN types, we performed PyN-specific optogenetic inactivation. We induced Cre-dependent expression of the inhibitory opsin stGtACR2<sup>44</sup> by injecting an adeno-associated virus (AAV) in the parietal and frontal cortex of *Fezf2*-, *PlexinD1*-, or *EMX*-Cre mice (Fig. 8a). To express stGtACR2 in CStr neurons of wildtype mice, we combined cortical AAV injections with multiple *CAV2*-Cre injections in the striatum (Fig. 8b). Locations of parietal and frontal injections were based on our earlier stimulus and choice analyses (Fig. 5a, 6a; dashed circles). We placed glass fiber implants ( $\phi = 0.4\text{mm}$ ) over each area to illuminate the cortical surface with blue light ( $\lambda = 470\text{ nm}$ , Irradiance =  $40\text{mW/mm}^2$ ). To test whether optogenetic effects are area-specific, we also targeted the primary visual cortex (V1) in a subset of *EMX* mice. To simplify the behavioral task during the optogenetic inactivation experiments, we only presented auditory stimuli on one side in each trial and kept the duration of the stimulus and delay periods constant (1 and 0.5 seconds, respectively).

Bilateral optogenetic inactivation of either parietal or frontal cortex of *EMX* mice strongly impaired auditory task performance (Fig. 8c). Performance was unaffected by V1 inactivation, demonstrating that parietal and frontal cortex are selectively required for auditory decisions. We then illuminated each area for 0.5 seconds during four different task episodes: Early and late stimulus (the first and last 0.5 seconds of the stimulus period), delay and response (Fig. 8d). In agreement with our observation that parietal cortex reflects stimulus driven activity (Fig. 5a, red traces), parietal inactivation strongly reduced animal's performance, particularly during the early stimulus period (Fig. 8e). Behavioral impairments (computed as the normalized difference between performance in non-optogenetic trials and chance) were weaker during the subsequent task periods, indicating that parietal cortex is most important for early processing of auditory stimuli. As expected, impairments were strongest in *EMX* mice where all PyNs were affected (gray trace). Surprisingly, however, only inactivating PT neurons resulted in a robust impairment, while behavioral effects were much weaker for IT or CStr neurons (blue versus green/orange traces). This suggests that the subcortical PT projection pathways in the parietal cortex have a larger causal impact on sensory processing than intracortical IT or CStr projections, pointing to a role for PT neurons that extends beyond preparation and execution of movements.

In frontal cortex, inactivation strongly impaired task performance in *EMX* mice, especially during the delay period, consistent with a role for frontal cortex in sensory integration and

working memory (Fig. 8f, gray trace)<sup>20,41,45</sup>. IT and CStr inactivation resulted in comparable behavioral impairments during the stimulus and delay periods (green and orange traces). Choice impairments in IT mice are therefore not solely due to the disruption of intracortical processing<sup>20</sup> but also involve alterations of CStr neurons. Inactivating PT neurons equally impaired animal performance during the stimulus and delay period but showed stronger effects during the final response period. Response impairments were similar for EMX and PT mice, suggesting that PT neurons are the main contributor for the execution of lick responses.

These results show that multiple PyN types in frontal cortex are involved in the formation and maintenance of choices, despite clear differences in their respective tuning. However only PT neurons are required for subsequent motor execution.

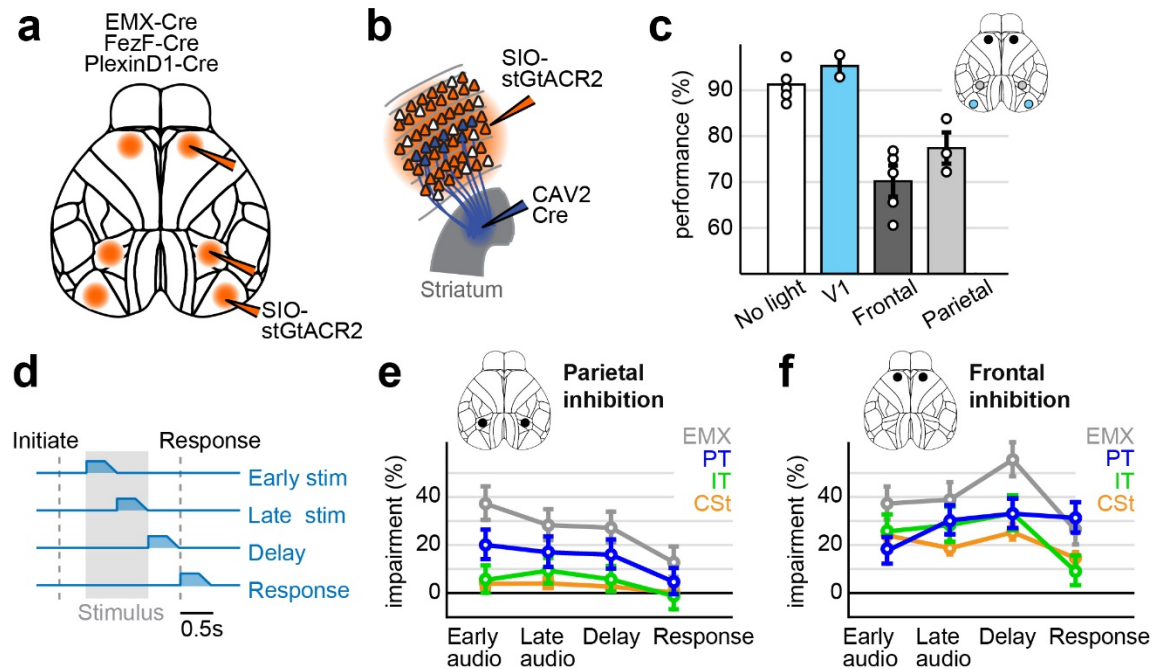

**Figure 8. Temporally restricted, PyN-specific inactivation of parietal and frontal cortex disrupts decisions.** **a)** Schematic of injection scheme to induce stGtACR2 expression in EMX, IT or PT neurons. Injections were performed in frontal and parietal cortex of EMX-Cre, Fezf2-Cre or PlexinD1-Cre mice. V1 injections were performed in a subset of control EMX mice. **b)** Retrograde CAV2-Cre virus injections in the striatum were combined with cortical injections of Cre-dependent stGtACR2 to selectively target CStr neurons. **c)** Behavioral performance of EMX mice during inactivation of V1, frontal or parietal cortex. Both frontal and parietal inhibition reduced task performance. Circles indicate individual mice, error bars show the s.e.m. **d)** Schematic of optogenetic inactivation paradigm. 0.5-s long optogenetic inhibition was performed during the first or last part of the stimulus period, the subsequent delay or the response period. Light power ramped down after 0.3 seconds. **e)** Behavioral impairment during inhibition of different PyN types in parietal cortex. Strongest effects are seen in EMX mice (gray) but also PT mice (blue). Impairments are weaker in IT (green) and CStr (orange) mice. Circles show mean impairments, error bars 95% confidence intervals. **f)** Behavioral impairment during inhibition of different PyN types in frontal cortex. Conventions as in e).

## Discussion

We measured and manipulated the activity of specific PyN types to assess if they are largely functionally distinct or instead follow similar cortex-wide dynamics. Cortex-wide activity patterns were clearly PyN-type-specific, demonstrating that they reflect distinct neural dynamics at multiple spatial scales. PyN type specificity was also evident for functional signals during auditory decision-making: each PyN type exhibited unique stimulus- and choice-related response patterns with pronounced differences in cortical localization and spatial specificity. These

response patterns were not observed when imaging from all PyNs unselectively. Optogenetic inactivation confirmed that PyN types in parietal and frontal cortex have distinct functional roles, highlighting the importance of subcortical projection pathways for sensory processing and choice formation. Taken together, our results suggest that different PyN types form parallel subnetworks throughout the cortex, are functionally-distinct, and perform separate roles during auditory decision-making.

For each PyN type, we observed unique cortex-wide activity patterns that were not found in unspecific EMX mice. By reducing cortical dynamics to a small set of spatiotemporal components<sup>33,46,47</sup>, we directly compared spatial activity patterns and found that virtually all spatial components were also PyN-type-specific. Differences between PyNs are therefore not limited to a specific subset of cortical activity patterns but rather appear to be a general rule throughout cortex. This has important implications for studies of cortex-wide neural dynamics, which are often based on indirect measures of neural activity, such as hemodynamic signals<sup>48,49</sup>, or pooled activity from all PyNs<sup>22,25,50,51</sup>. Earlier work revealed intricate circuit motifs and functional modules that span the entire cortex<sup>46,50-53</sup> and largely follow intracortical connectivity patterns<sup>54,55</sup>. Our results strongly suggest that additional circuit motifs could be discovered when isolating the activity from different PyN types, especially subcortical projection types, such as PT or CStr neurons. Furthermore, most PyN-specific LocaNMF components consisted of spatially precise subregions that were smaller than Allen CCF areas. Detailed analysis of PyN-specific activity might therefore reveal more detailed structure than can be observed with nonspecific measures. For future studies, a particularly interesting approach to achieve this would be to combine large-scale measures of multiple PyN types with multi-color widefield imaging<sup>24,56</sup>. This would make it possible to directly observe interactions between PyN-specific cortical dynamics.

To isolate sensory activity, we used an encoding model and found clear responses in sensory, parietal and frontal cortex<sup>40,41,57,58</sup>. Consistent with our clustering results, these functional signals were unique for each PyN type and were either only partially represented in EMX mice or not observed at all. This functional segregation is in line with results from individual sensory areas, such as primary somatosensory<sup>18,59</sup> and visual cortex<sup>19</sup>, and further suggests that different PyN types have separate roles during sensory processing. A recent study also found sensory responses in parietal cortex and established a causal role for the parietal area A in auditory decision-making<sup>58</sup>. In line with this, we also observed side-specific responses in area A for EMX and IT neurons. Surprisingly, sensory responses in PT and CStr neurons were located more medially and also differed in their side-specificity, suggesting that they might have distinct functional roles. To test this hypothesis, we performed PyN-specific parietal inactivations. Inactivation of parietal PT neurons during the stimulus presentation strongly disrupted eventual decisions. IT inactivation, by contrast, caused only weak behavioral effects. This argues against models in which task-relevant sensory information is directly transmitted from parietal to frontal cortex during decision formation<sup>40,58,60</sup> and instead highlights the importance of subcortical projection pathways via PT neurons<sup>61-63</sup>. A likely subcortical target is the SC, which receives inputs from PT neurons<sup>18,26</sup> and has been implicated with somatosensory<sup>18</sup> and visual<sup>61,63</sup> perception, and decision-making<sup>38,62,64</sup>. Parietal CStr neurons were not required for sensory perception and may thus serve a different function, such as tracking task history<sup>65</sup>.

Using a decoder analysis, we found that activity in the frontal cortex predicted animal's left and right choices. This is consistent with earlier work<sup>20,40,45,66</sup> but seems at odds with recent cortex-wide studies that found prominent movement-related activity but almost no choice-selectivity in cortex<sup>38,67</sup>. A potential reason could be that choice-related activity was indeed much weaker than



movement signals and could therefore be obscured by movement signals if they are not separated in time<sup>37</sup>. Another possibility is that cortical circuits were more important for our specific task, because it included accumulation of sensory evidence and working memory<sup>67,68</sup>. This hypothesis is consistent with the ramping of choice signals we observed in PT neurons, which might reflect the activity of Thalamus-projecting PT neurons during working memory<sup>13</sup>. Interestingly, choice signals in IT mice gradually declined, reflecting the choice-specific inhibition of CStr neurons. In both IT and CStr mice, choice-specific inhibition was only seen in ALM which is implicated in movement generation<sup>13,45</sup>. A potential reason for the suppression of CStr projections could therefore be to prevent competing motor behaviors by the basal ganglia that may interfere with an appropriate licking response. In agreement with our imaging results, frontal inactivation strongly impaired animal behavior during the stimulus and delay period, suggesting an important role for the translation of sensory inputs into behavior<sup>21,67,69–71</sup>. Impairments were largely similar for all frontal PyN types, which appear to be equally required for choice formation and retention. Frontal PyNs may thus be more reliant on each other to maintain accurate function than in sensory areas<sup>18,19,72</sup>. As the only exception, PT neurons were more important during the response period, consistent with a specific role of brainstem-projecting PT neurons for motor execution<sup>13</sup>.

Our PyN-specific imaging largely relied on mice where GCaMP-expression was restricted to specific neural subpopulations. A possible concern is hereby the extent to which different PyN-types might still be mixed together. Indeed, many layer-specific mouse lines often combine PyN-types with diverse projection targets<sup>13,17,58,59</sup>. Moreover, transgenes in most PyN driver lines are inserted at random integration sites, which can lead to unstable expression patterns across cortical areas or mixtures of cell types due to interactions with surrounding genetic elements<sup>26,73</sup>. In contrast, we used temporally inducible knock-in lines which closely reflect endogenous gene expression during brain development, resulting in more even and specific expression in cortex<sup>26</sup>. To further separate PyN types that contain neurons with different projection targets, such as IT neurons that project to both cortex and striatum, we additionally developed a novel retrograde labeling strategy that allowed us to monitor the cortex-wide activity of a PyN type based on projection target. Since the definition of a PyN type may depend on the question at hand, both the genetic and retrograde approaches will be useful for future studies that aim to study cortex-wide activity of PyN-types in different behavioral contexts.

Our work offers a new perspective on cortex-wide dynamics by viewing them through the lens of different PyN types and strongly supports the view that cortical circuits perform parallel computations, even within the same cortical layer<sup>13,18,19</sup>. We defined cell types either by developmental lineage or projection target because a unifying definition remains elusive. Subcortical areas are targeted by genetically-distinct PyNs<sup>12,26</sup> and broader PyN types, such as PT neurons, contain subtypes with different projection targets<sup>13</sup>. Future studies may therefore combine retrograde labeling and transgenic lines to target PyN subtypes with even higher specificity<sup>26</sup> and resolve the functional heterogeneity that is often encountered when studying cortical decision circuits without the right tools.

## Acknowledgements

We thank Z. Josh Huang for providing us with Fezf2 and PlexinD1 mice, as well as for many helpful conversations. We thank Shreya Saxena and Joao Cuoto for technical advice, Anup Khanal for helping with perfusions, and Pavel Osten and Rhonda Drewes for contributions to histology and imaging. We thank Adam Kepecs and Shujing Li for providing us with the AAV-DJ-hCAR virus. Financial support was received from the Deutsche Forschungsgemeinschaft (SM, German Research Foundation, DFG - 368482240/GRK2416), NIH MH120888 (XRS).

## Methods

### Mouse lines

All surgical and behavioral procedures conformed to the guidelines established by the National Institutes of Health and were approved by the Institutional Animal Care and Use Committee of Cold Spring Harbor Laboratory. Experiments were conducted with male mice between the ages of 8 to 25 weeks. No statistical methods were used to pre-determine sample sizes but our sample sizes are similar to those reported in previous publications<sup>22,25</sup>. All mouse strains were acquired from the Jackson Laboratory, the Allen Brain Institute, or generated at Cold Spring Harbor Laboratory. Transgenic strains crossed to generate double- and triple-transgenic mice used for imaging: Emx-Cre (JAX 005628), LSL-tTA (JAX 008600), Ai93D (JAX 024103), Ai162 (JAX 031562), G6s2 (JAX 024742) and H2B-eGFP (JAX 006069). EMX mice, used for calcium imaging, were bred as Ai93D;Emx-Cre;LSL-tTA. To avoid potential aberrant cortical activity patterns, EMX mice were on a doxycycline-containing diet (DOX), preventing GCaMP6 expression until they were 6 weeks or older<sup>22,25</sup>. To obtain PT- and IT-specific transgenic lines, we used two inducible knock-in mouse lines (Fezf2-2A-CreER and PlexinD1-2A-CreER) that were generated by inserting a 2A-CreER or 2A-Flp cassette in-frame before the STOP codon of the targeted gene. Both strains have been extensively characterized to reflect endogenous gene expression patterns that are closely linked to specific excitatory neuron types and induce robust and uniform expression throughout the cortex<sup>26</sup>. They are available from Jackson Laboratory (Fezf2-2A-CreER, JAX 036296 and PlexinD1-2A-CreER, JAX 036295). For widefield imaging, each strain was mated with Ai162 reporter mice to induce expression of GCaMP6s in Fezf2- or PlexinD1-positive neurons. Additionally, we crossed Ai162 with G6s2 (tetO-GCaMP6s, JAX 024742) to create the hybrid reporter strain Ai162;G6s2, with Cre-dependent tTA expression as well as two copies of GCaMP6s under tetO control. This hybrid reporter line is not affected by leaky reporter gene expression seen in Ai162 homozygotes and expresses GCaMP6s at higher levels than Ai162 hemizygotes. To express GCaMP6s for widefield imaging in corticostriatal projection neurons, we performed striatal injections of retrograde viral vector using the hybrid Ai162;G6s2 reporter line (see section: viral injections).

### General surgical procedures

All surgeries were performed under 1-2% isoflurane in oxygen anesthesia. After induction of anesthesia, 1.2 mg/kg of meloxicam was injected subcutaneously and sterile lidocaine ointment was applied topically to the skin incision site. After making a midline cranial incision, the skin was retracted laterally and fixed in position with tissue adhesive (Vetbond, 3M). We then built an outer wall using dental cement (C&B Metabond, Parkell; Ortho-Jet, Lang Dental) along the lateral edge of the dorsal cranium (frontal and parietal bones) to maximize the area of exposed skull. A custom titanium skull post was then attached to the dental cement. For skull clearing, debris and periosteum were thoroughly cleaned from the skull followed by the application of a thin layer of cyanoacrylate (Zap-A-Gap CA+, Pacer technology).

### Viral injections

After induction with isoflurane anesthesia, animals were placed in a stereotaxic frame (David Kopf Instruments). The skull was leveled along both the rostral-caudal and medio-lateral axis, allowing precise and reproducible targeting. All injections were made using a programmable nanoliter injector (Nanoject III, Drummond Scientific, PA). Retrograde targeting of pan-corticostriatal projection neurons were performed in C57BL/6J mice (3-4 weeks of age) through bilateral stereotaxic injections of CAV-2-Cre into the dorsal striatum at three striatal targets per hemisphere spanning the rostro-caudal axis. The coordinates relative to bregma (in mm) are (1) RC +0.75, ML

$\pm 1.8$ , DV 3.0; (2) RC 0, ML  $\pm 2.2$ , DV 3.1; (3) RC -0.75, ML  $\pm 2.9$ , DV 3.1. For each striatal target, a minimal craniotomy was created using a small dental burr followed by injection of  $1.8 \times 10^9$  purified particles (pp) of CAV-2-Cre using pipettes with long taper tips pulled from borosilicate capillaries (3.5" Drummond # 3-000-203-G/X, Drummond Scientific, PA).

For cell type-specific optogenetic silencing experiments, we performed bilateral frontal and parietal cortex injections (coordinates relative to bregma (in mm): frontal cortex: RC 2.5, ML  $\pm 1.5$ ; parietal cortex: RC -1.7, ML  $\pm 2.5$ ) of Cre-dependent stGtACR2 (AAV1-hSyn-SIO-stGtACR2-FusionRed, Upenn Vector Core). Injections were made in Fezf2-2A-CreER, PlexinD1-2A-CreER, and EMX-Cre (6-8 weeks old) reporter mice to induce expression of stGtACR2 in different PyN types. In mice with ligand-activated Cre recombinase activity, intraperitoneal tamoxifen was administered one week after viral injections. Injections ( $4 \times 10^8$  vg per injection) were made at two depths (300 and 600  $\mu$ m) per cortical target. In two EMX-Cre mice, bilateral injections were performed in the frontal and visual cortex (RC -4, ML  $\pm 2.5$ ). To express stGtACR2 in corticostriatal projection neurons, C57BL/6J mice were injected in two stages. A mixture of AAV1-SIO-hSyn1-stGtACR2-FusionRed and AAV-DJ-hCAR (a gift from the laboratory of Adam Kepecs) was injected into the cortex of 3–4-week-old mice, followed by bilateral striatal CAV-2-Cre injections 6 weeks later (as described above).

### Optical fiber implantation

For optogenetic silencing, we used the soma-targeted anion-conducting channelrhodopsin stGtACR2 in target neuronal populations<sup>44</sup>. Optical fibers (NA = 0.36,  $\phi$  = 0.4mm, FT400UMT, Thorlabs) were glued into metal or ceramic ferrules ( $\phi$  = 1.25mm, Thorlabs) and secured above the cortex following viral injections at each target. In Fezf2 and PlexinD1 mice, ferrule-enclosed fibers were implanted immediately following cortical AAV injection. In CStr mice, fiber implantation immediately followed striatal CAV-2-Cre injections. Optical fibers were implanted extradural to the site of cortical injections and interfaced with a thinned layer of skull using cyanoacrylate. Upon curing of the cyanoacrylate, the fiber was secured to the skull using light-cured glass ionomer (Vitrebond, 3M). Additional layers of dental cement as well as dental acrylic (Lang Dental Jet Repair Acrylic; Part#1223MEH) were applied to reinforce the implants for durability and long-term stability. After all layers were cured, an outer coating of cyanoacrylate as well as nail polish were applied.

### Behavioral training

The behavioral setup was controlled with a microcontroller-based (Arduino Due) finite state machine (Bpod r0.5, Sanworks) using custom Matlab code (2015b, Mathworks) running on a Linux PC. Servo motors (Turnigy TGY-306G-HV) and touch sensors were controlled by microcontrollers (Teensy 3.2, PJRC) running custom code. Forty-five mice were trained on a delayed, spatial discrimination task. Mice initiated trials by placing their forepaws on at least one of the two handles, which were mounted on servo motors that rotated out of reach during the inter-trial period. Upon trial initiation, animals placed their forepaws on the handles and, after a variable duration of 0.25-0.75 seconds of continuous contact, the auditory stimulus was presented. Auditory stimuli consisted of a sequence of Poisson-distributed, 3-ms long auditory click sounds<sup>35</sup>, presented from either a left and/or right speaker for a variable duration between 1 and 1.5 seconds. The stimulus period was followed by a variable delay of up to 1 second, then the servo motors moved two lick spouts into close proximity of the animal's mouth. If the animal licked twice on the side where more clicks were presented, a drop of water reward was dispensed. The amount of water rewarded per trial (typically 1.5 to 3  $\mu$ l) is constant within a single session but may be



adjusted daily based on the animal's body weight. After one spout has been licked twice, the contralateral spout moved out of reach to force the animal to commit to its decision.

All trained mice were housed in groups of two or more under reverse light cycle (12-hour dark and 12-hour light) and trained during their active dark cycle. Animals were trained over the course of approximately 30-60 days. After 2-3 days of restricted water access, animals began habituation to head fixation and received water from spouts in the behavior chamber. During these sessions, unilateral auditory stimuli were presented followed by a droplet of water dispensed freely from the ipsilateral water spout. After several habituation sessions, animals were then required to touch the handles to trigger stimulus presentation. Once mice could reliably reach for the handles, the required touch duration was progressively increased up to 0.75 seconds. During the next stage of training, self-performed trials, where both spouts moved within reach of the animal following stimulus presentation, were progressively introduced. An animal was considered trained when its detection performance across two or more sessions was above 80%.

### **Behavioral monitoring**

Data was collected from multiple sensors in the behavioral setup to measure different aspects of animal movement. Touch sensors using a grounding circuit on handles and lick spouts detected contact with the animal's forepaws and tongue, respectively. A piezo sensor (1740, Adafruit LLC) below the animal's trunk was used to for monitoring body and hindlimb movements. Two webcams (C920 and B920, Logitech) were used for video recording of animal movements. Cameras were positioned to capture the animal's face (side view) and the ventral surface of the body (ventral view).

### **Widefield imaging**

Widefield imaging was done as reported previously<sup>23,32,74</sup> using an inverted tandem-lens microscope in combination with an sCMOS camera (Edge 5.5, PCO) running at 30 fps. The top lens had a focal length of 105 mm (DC-Nikkor, Nikon) and the bottom lens 85 mm (85M-S, Rokinon). The field of view was 12.5 x 10.5 mm<sup>2</sup> and the imaging resolution was 640 x 540 pixels after 4x spatial binning, resulting in a spatial resolution of ~20 μm per pixel. To capture GCaMP fluorescence, a 525 nm band-pass filter (#86-963, Edmund optics) was placed in front of the camera. Using excitation light at two different wavelengths, we isolated Ca<sup>2+</sup>-dependent fluorescence and corrected for intrinsic signals (e.g., hemodynamic responses)<sup>22,25</sup>. Excitation light was projected on the cortical surface using a 495 nm long-pass dichroic mirror (T4951pxr, Chroma) placed between the two macro lenses. The excitation light was generated by a collimated blue LED (470 nm, M470L3, Thorlabs) and a collimated violet LED (405 nm, M405L3, Thorlabs) that were coupled into the same excitation path using a dichroic mirror (#87-063, Edmund optics). We alternated illumination between the two LEDs from frame to frame, resulting in one set of frames with blue and the other with violet excitation at 15 fps each. Excitation of GCaMP at 405 nm results in non-calcium dependent fluorescence<sup>75</sup>, allowing us to isolate the true calcium-dependent signal by rescaling and subtracting frames with violet illumination from the preceding frames with blue illumination. All subsequent analysis was based on this differential signal. The imaging data was then rigidly aligned to the Allen common coordinate framework (CCF), using four anatomical landmarks: the left, center and right points where anterior cortex meets the olfactory bulbs, and the medial point at the base of retrosplenial cortex. Retinotopic visual mapping experiments<sup>31,76</sup> confirmed accurate CCF alignment and showed high correspondence between functionally identified visual areas and the CCF across PyN types (Fig. 1c).

### **Optogenetic inactivation**

Photostimulation was performed using light from a 470 nm high-power LED (M470F3, Thorlabs) with a power density of 10 mW/mm<sup>2</sup>. Stimuli consisted of a square wave stimulus that ramped down in power for 200 milliseconds, to avoid an excitatory post-illumination rebound due to sudden release of inhibition<sup>77</sup>. To prevent animals' visual detection of photostimulation, either through external leakage from light-insulated mating sleeves or transmission to the retina across the brain, an external LED with matching wavelength placed at the center of the animal's visual field was flashed throughout the duration of every trial. Photoinhibition was performed in 20% of total trials and randomly interleaved between light-off trials. During each session, only bilateral frontal, parietal or visual cortex inhibition was performed. Once an animal was habituated and able to complete detection behavior trials with > 90% accuracy, optogenetic inactivation trials were introduced. During these initial sessions, optogenetic inhibition was performed from the beginning of the stimulus epoch until the end of the delay epoch. Additionally, we performed 0.5-second inhibition during four pre-defined epochs of the detection behavior trials: (1) first half of the stimulus, (2) second half of the stimulus, (3) delay, (4) response.

### **Immunohistology, microscopy and image analysis**

For a given animal, after all experiments were concluded, we performed transcardial perfusion with PBS followed by fixation with 4% PFA in 0.1 M PB. Brains were post-fixed in 4% PFA for an additional 12-18 hours at 4°. Prior to sectioning, brains were rinsed three times in PBS and embedded in 4% agarose-PBS. Slices 50 µm in thickness were made using a vibrating microtome (Leica, VT100S). Sections were then suspended in blocking solution (10% Normal Goat Serum and 0.1% Triton-X100 in 1X PBS) for 1 hour followed by overnight incubation at 4 °C with the primary antibody. Next, sections were washed with PBS, incubated for 1 h at room temperature with the secondary antibody at 1:500 dilution. For visualization of GCaMP6s, we used primary goat polyclonal anti-GFP antibody (Abcam) and secondary donkey anti-goat Alexa Fluor 488 (Abcam). Sections were then dry-mounted on slides using Vectashield (Vector Labs, H1000) prior to imaging. Imaging was performed using upright fluorescence microscope and microscope (Olympus BX61). Images were acquired using Ocular Scientific Image Acquisition Software (Teledyne Imaging) and visualization and analysis were performed using ImageJ/FIJI software packages.

### **Preprocessing of neural data**

We first performed motion correction on each imaging frame, using a rigid-body image registration method implemented in the frequency domain<sup>78</sup> that aligned each frame to the median over all frames in the first trial. To reduce the computational cost of subsequent analyses, we then computed the 200 highest-variance components using singular value decomposition (SVD). These components accounted for at least 95% of the total variance in each recording, whereas computing 500 components accounted for little additional variance (~0.15%). SVD reduces the raw imaging data  $Y$  to a matrix of 'spatial components'  $U$  (of size pixels by components), 'temporal components'  $V^T$  (of size components by frames) and singular values  $S$  (of size components by components) to scale temporal components to the original data. So the resulting decomposition has the form  $Y = USV^T$ . All subsequent analysis in the time domain (such as the encoder and decoder models described below) were then performed on the product  $SV^T$  and the respective results were later multiplied with  $U$ , to recover results for the original pixel space. To avoid slow drift in the imaging data,  $SV^T$  was high-pass filtered above 0.1 Hz using a zero-phase, second-order Butterworth filter.

To compute trial averages and perform choice decoder analysis (see below), imaging data in individual trials were aligned to the four trial periods, each marked by a specific event. This was

required because the duration of different trial events was randomized to reduce temporal correlations, e.g. between trial initiation, the stimulus presentation and subsequent lick responses. The first period (Initiate) was aligned to the time when animal initiated a trial by touching the handles, the second (Stimulus) was aligned to the stimulus onset, the third (Delay) to the end of the stimulus sequence, and the fourth (Response) to the time when spouts were moved in to allow a lick response. After alignment, the total trial duration was 2 seconds and durations of respective trial episodes were 0.5 (Initiate), 1 (Stimulus), 0.2 (Delay), and 0.3 seconds (Response).

## Spatial clustering and classification

To obtain more interpretable spatial components and assess the dimensionality of cortical activity in different PyN types, we used semi-nonnegative matrix factorization (sNMF). As with SVD, sNMF also creates spatial and temporal components for each session and for each mouse but enforces that spatial components are strictly positive. We used the LocaNMF toolbox by Saxena et al<sup>33</sup> (<https://github.com/ikinsella/locaNMF>) to transform the spatial and temporal components  $U$  and  $SV^T$  into two corresponding matrices  $A$  and  $C$ , where  $A$  is a matrix of non-negative spatial components (of size pixels by components) and  $C$  the corresponding temporal components (of size components by frames). In addition to regular sNMF, the LocaNMF toolbox can be initialized with spatial constraints that are based on the Allen CCF. To obtain spatially restricted localized LocaNMF components, we therefore constructed a map of larger seed regions obtained by merging several smaller areas in the Allen CCF together (Fig. 2D). This region map is then used to enforce that each component in  $A$  is sparse outside the boundary of a given region. The amount of possible overlap between regions is specified by a localization threshold which specifies the percentage of a given component that is constrained to be inside a single region's boundary. To obtain dense spatial components that were mostly driven by the local correlations between pixels and could also lie at the border between seed regions we used a localization threshold of 50%. To obtain unconstrained sNMF spatial components, we also used the LocaNMF toolbox but only provided a single region that spanned the entire cortex. This resulted in cortex-wide components, similar to vanilla sNMF, while ensuring that all other analysis steps were done equally for sNMF and LocaNMF components. In both cases, we computed components in  $A$  and  $C$  that at least explained 99% of the variance of  $Y$  (with  $Y=AC$ ) after the initial SVD.

To compare spatial sNMF and LocaNMF components from different PyN types, we embedded them in a 2-dimensional space, using Uniform Manifold Approximation and Projection (UMAP) analysis (Fig. 2b,f). UMAP analysis was performed with the UMAP toolbox by McInnes et al.<sup>34</sup> (<https://github.com/lmcinnes/umap>). For each recording, the first 20 spatial components in  $A$  (either from sNMF or region-constrained LocaNMF) were downsampled by a factor of 2, smoothed with a 2-D gaussian filter (5 x 5 pixels, 2 pixel standard deviation) and peak-normalized. Components from all recordings and animals were then combined into a larger matrix (of size pixels by components) and we used UMAP to project the first (pixel) dimension into two, maximally separating non-linear dimensions. Each point in the two dimensional space (Fig. 2b,f) therefore reflects a single component from one animal in a given imaging session.

To identify PyN types based on individual components, we tested each of the first 20 components in each session 10 times (200 repetitions per session). In every repetition, 500 components were randomly selected from all mice (except the one from which the current component was taken) and we assigned the PyN type based on the majority type in the 10 nearest neighbors of the current component in UMAP space. Classifier accuracy for each session (Fig. 2c,g) was then computed as the mean probability over all repetitions to accurately identify the PyN type. The same procedure was used for either sNMF or locaNMF components.

## Linear encoding model

The linear encoding model was based on a combination of task- and movement-related variables, as described previously<sup>32</sup>. Each variable consisted of multiple regressors that were combined into a larger design matrix. Binary regressors contained a single pulse the occurrence of specific events, such as the stimulus onset, and additional regression copies that were shifted forward or backward in time to account for changes in cortical activity before or after the respective event. For auditory stimuli, the time-shifted copies spanned all frames from the onset of the auditory sequence until the end of the trial. Individual click sounds were also captured by an additional regressor set that spanned the 2 seconds after click onset. For motor events like licking or whisking, the time-shifted copies spanned the frames from 1 s before until 2 s after each event. Lastly, for some variables such as the previous choice, the time-shifted copies spanned the whole trial. Other variables were analog, such as measures from the piezo sensor or the pupil diameter, and also contained the 200 highest temporal components of video information from both cameras (using SVD as described above). This ensured that the model could account for animal movements and accurately isolate task-related activity. Movement and task variables were additionally decorrelated due to the variable durations of the initiation, stimulus and delay period. The model was fit using ridge regression and the regularization penalty was estimated separately for each column of the widefield data using marginal maximum likelihood estimation<sup>79</sup>. Ridge regression was chosen to allow for similar contributions from different correlated variables.

## Variance analysis

Explained variance ( $cvR^2$ ) was obtained using 10-fold cross-validation. To assess unique explained variance by individual variables ( $\Delta R^2$ ), we created reduced models in which all regressors of a specific variable were shuffled in time. The difference in explained variance between the full and the reduced model yielded the unique contribution  $\Delta R^2$  of that model variable that could not be explained by other variables in the model. The same approach was used to compute unique contributions for groups of variables, i.e., ‘Movements’ and ‘Task’. Here, all variables that corresponded to a given group were shuffled at once.

## Decoding model

To predict animal’s left/right choices from widefield data, we trained logistic regression decoders with an L1 penalty on the temporal component matrix  $SV^T$  in each session. When decoding choice, we randomly removed trials until there was an equal amount of correct and incorrect trials where mice chose the left and the right side. By balancing left/right choice sides and correct/incorrect trials, we ensured that the decoder would not predict choices due to corresponding sensory information or would be influenced by potential side biases. The logistic regression model was implemented in Matlab using the ‘fitclinear’ function and run repeatedly for each time point in individual trials after re-aligning them to trial periods as described above. In each session, all decoder runs were performed with the same amount of trials (at least 250 trials) and we used 10-fold cross-validation to compute decoder accuracy at each time point in the trial. Beta weights were averaged from all models created during cross-validation and convolved with the spatial component matrix  $U$  to create cortical maps of decoder weights.



### Number of mice per experimental group

| <b>Optogenetics</b> |                       |
|---------------------|-----------------------|
| <b>Cell type</b>    | <b>Number of mice</b> |
| Emx                 | 5                     |
| CStr                | 5                     |
| Fezf2               | 8                     |
| PlexinD1            | 8                     |
| <b>Widefield</b>    |                       |
| Emx                 | 4                     |
| CStr                | 6                     |
| Fezf2               | 5                     |
| PlexinD1            | 4                     |

### Key resources table

| <b>Reagent/resource</b>                                                                         | <b>Source</b>                              | <b>Identifier</b> |
|-------------------------------------------------------------------------------------------------|--------------------------------------------|-------------------|
| <b>Antibodies</b>                                                                               |                                            |                   |
| Goat polyclonal anti-GFP                                                                        | Abcam                                      | ab6673            |
| Donkey Anti-Goat Alexa Fluor 488                                                                | Abcam                                      | ab150129          |
| <b>Viral strains</b>                                                                            |                                            |                   |
| CAV-2-Cre                                                                                       | Plateforme de Vectorologie de Montpellier  | N/A               |
| AAV1-hSyn1-SIO-stGtACR2-FusionRed                                                               | Penn Vector Core                           | 105677-AAV1       |
| AAV-DJ-hCAR                                                                                     | Laboratory of Adam Kepecs                  |                   |
| <b>Experimental Models</b>                                                                      |                                            |                   |
| Mouse: Emx1-IRES-Cre: Emx1 <sup>tm1(cre)Kvj</sup>                                               | The Jackson Laboratory                     | JAX#005628        |
| Mouse: ROSA:LNL:tTA: Gt(ROSA)26Sor <sup>tm1(tTA)Roos</sup>                                      | The Jackson Laboratory                     | JAX#008600        |
| Mouse: Camk2 $\alpha$ -tTA: Tg(Camk2a-tTA)1Mmay                                                 | The Jackson Laboratory                     | JAX#003010        |
| Mouse: Ai93(TITL-GCaMP6f)-D (Ai93D): Igs7 <sup>tm93.1(tetO-GCaMP6f)Hze</sup>                    | The Jackson Laboratory                     | JAX#024103        |
| Mouse: Ai162(TIT2L-GC6s-ICL-tTA2)-D (Ai162D): Igs7 <sup>tm162.1(tetO-GCaMP6s,CAG-tTA2)Hze</sup> | H. Zeng, Allen Institute for Brain Science | JAX#031562        |
| Mouse: TRE-GCaMP6s (G6s2): Tg(tetO-GCaMP6s)2Niell                                               | The Jackson Laboratory                     | JAX#024742        |
| Mouse: H2B-eGFP: Tg(HIST1H2BB/EGFP)1Pa                                                          | The Jackson Laboratory                     | JAX#006069        |
| Mouse: Fezf2-2A-CreER: Fezf2 <sup>tm1.1(cre/ERT2)Zjh</sup>                                      | The Jackson Laboratory                     | JAX#036296        |
| Mouse: PlexinD1-2A-CreER: Plxnd1 <sup>tm2.1(flpo)Zjh</sup>                                      | The Jackson Laboratory                     | JAX#036295        |
| <b>Software</b>                                                                                 |                                            |                   |
| MATLAB 2018B                                                                                    | Mathworks                                  |                   |
| Python 3.6.10                                                                                   | Python Software Foundation                 |                   |
| <b>Other</b>                                                                                    |                                            |                   |
| Bpod State Machine r0.5                                                                         | Sanworks                                   | N/A               |

## References

1. Harris, K. D. & Mrsic-Flogel, T. D. Cortical connectivity and sensory coding. *Nature* **503**, 51–58 (2013).
2. Pfeffer, C. K., Xue, M., He, M., Huang, Z. J. & Scanziani, M. Inhibition of Inhibition in Visual Cortex: The Logic of Connections Between Molecularly Distinct Interneurons. *Nat Neurosci* **16**, 1068–1076 (2013).
3. Keller, A. J. *et al.* A Disinhibitory Circuit for Contextual Modulation in Primary Visual Cortex. *Neuron* **108**, 1181–1193.e8 (2020).
4. Tremblay, R., Lee, S. & Rudy, B. GABAergic Interneurons in the Neocortex: From Cellular Properties to Circuits. *Neuron* **91**, 260–292 (2016).
5. Cardin, J. A. *et al.* Driving fast-spiking cells induces gamma rhythm and controls sensory responses. *Nature* **459**, 663–667 (2009).
6. Veit, J., Hakim, R., Jadi, M. P., Sejnowski, T. J. & Adesnik, H. Cortical gamma band synchronization through somatostatin interneurons. *Nature Neuroscience* **20**, 951–959 (2017).
7. Sohal, V. S., Zhang, F., Yizhar, O. & Deisseroth, K. Parvalbumin neurons and gamma rhythms enhance cortical circuit performance. *Nature* **459**, 698–702 (2009).
8. Reimer, J. *et al.* Pupil fluctuations track fast switching of cortical states during quiet wakefulness. *Neuron* **84**, 355–362 (2014).
9. Fu, Y. *et al.* A Cortical Circuit for Gain Control by Behavioral State. *Cell* **156**, 1139–1152 (2014).
10. Zhou, M. *et al.* Scaling down of balanced excitation and inhibition by active behavioral states in auditory cortex. *Nature Neuroscience* **17**, 841–850 (2014).

11. Polack, P.-O., Friedman, J. & Golshani, P. Cellular mechanisms of brain state–dependent gain modulation in visual cortex. *Nature Neuroscience* **16**, 1331–1339 (2013).
12. Tasic, B. *et al.* Shared and distinct transcriptomic cell types across neocortical areas. *Nature* **563**, 72–78 (2018).
13. Economo, M. N. *et al.* Distinct descending motor cortex pathways and their roles in movement. *Nature* **563**, 79–84 (2018).
14. Chen, J. L., Carta, S., Soldado-Magraner, J., Schneider, B. L. & Helmchen, F. Behaviour-dependent recruitment of long-range projection neurons in somatosensory cortex. *Nature* **499**, 336–340 (2013).
15. Glickfeld, L. L., Andermann, M. L., Bonin, V. & Reid, R. C. Cortico-cortical projections in mouse visual cortex are functionally target specific. *Nat Neurosci* **16**, 219–226 (2013).
16. Kim, T. *et al.* Cortically projecting basal forebrain parvalbumin neurons regulate cortical gamma band oscillations. *PNAS* **112**, 3535–3540 (2015).
17. Harris, K. D. & Shepherd, G. M. G. The neocortical circuit: themes and variations. *Nature Neuroscience* **18**, 170–181 (2015).
18. Takahashi, N. *et al.* Active dendritic currents gate descending cortical outputs in perception. *Nature Neuroscience* 1–9 (2020) doi:10.1038/s41593-020-0677-8.
19. Tang, L. & Higley, M. J. Layer 5 Circuits in V1 Differentially Control Visuomotor Behavior. *Neuron* **105**, 346-354.e5 (2020).
20. Li, N., Chen, T.-W., Guo, Z. V., Gerfen, C. R. & Svoboda, K. A motor cortex circuit for motor planning and movement. *Nature* **519**, 51–56 (2015).
21. Chen, T.-W., Li, N., Daie, K. & Svoboda, K. A Map of Anticipatory Activity in Mouse Motor Cortex. *Neuron* **94**, 866-879.e4 (2017).

22. Wechselblatt, J. B., Flister, E. D., Piscopo, D. M. & Niell, C. M. Large-scale imaging of cortical dynamics during sensory perception and behavior. *Journal of Neurophysiology* **115**, 2852–2866 (2016).
23. Couto, J. *et al.* Chronic, cortex-wide imaging of specific cell populations during behavior. *Nat Protoc* 1–25 (2021) doi:10.1038/s41596-021-00527-z.
24. Cardin, J. A., Crair, M. C. & Higley, M. J. Mesoscopic Imaging: Shining a Wide Light on Large-Scale Neural Dynamics. *Neuron* **108**, 33–43 (2020).
25. Allen, W. E. *et al.* Global Representations of Goal-Directed Behavior in Distinct Cell Types of Mouse Neocortex. *Neuron* **94**, 891-907.e6 (2017).
26. Matho, K. S. *et al.* Genetic dissection of glutamatergic neuron subpopulations and developmental trajectories in the cerebral cortex. *bioRxiv* 2020.04.22.054064 (2020) doi:10.1101/2020.04.22.054064.
27. Gerfen, C. R., Paletzki, R. & Heintz, N. GENSAT BAC cre-recombinase driver lines to study the functional organization of cerebral cortical and basal ganglia circuits. *Neuron* **80**, 1368–1383 (2013).
28. Harris, J. A. *et al.* Anatomical characterization of Cre driver mice for neural circuit mapping and manipulation. *Front Neural Circuits* **8**, 76 (2014).
29. Daigle, T. L. *et al.* A Suite of Transgenic Driver and Reporter Mouse Lines with Enhanced Brain-Cell-Type Targeting and Functionality. *Cell* **174**, 465-480.e22 (2018).
30. Wang, Q. *et al.* The Allen Mouse Brain Common Coordinate Framework: A 3D Reference Atlas. *Cell* **181**, 936-953.e20 (2020).
31. Garrett, M. E., Nauhaus, I., Marshel, J. H. & Callaway, E. M. Topography and Areal Organization of Mouse Visual Cortex. *J. Neurosci.* **34**, 12587–12600 (2014).



32. Musall, S., Kaufman, M. T., Juavinett, A. L., Gluf, S. & Churchland, A. K. Single-trial neural dynamics are dominated by richly varied movements. *Nat Neurosci* **22**, 1677–1686 (2019).
33. Saxena, S. *et al.* Localized semi-nonnegative matrix factorization (LocaNMF) of widefield calcium imaging data. *PLOS Computational Biology* **16**, e1007791 (2020).
34. McInnes, L., Healy, J. & Melville, J. UMAP: Uniform Manifold Approximation and Projection for Dimension Reduction. *arXiv:1802.03426 [cs, stat]* (2018).
35. Brunton, B. W., Botvinick, M. M. & Brody, C. D. Rats and Humans Can Optimally Accumulate Evidence for Decision-Making. *Science* **340**, 95–98 (2013).
36. Salkoff, D. B., Zagha, E., McCarthy, E. & McCormick, D. A. Movement and Performance Explain Widespread Cortical Activity in a Visual Detection Task. *Cereb Cortex* **30**, 421–437 (2020).
37. Orsolic, I., Rio, M., Mrcic-Flogel, T. D. & Znamenskiy, P. Mesoscale cortical dynamics reflect the interaction of sensory evidence and temporal expectation during perceptual decision-making. *Neuron* **109**, 1861-1875.e10 (2021).
38. Steinmetz, N. A., Zatka-Haas, P., Carandini, M. & Harris, K. D. Distributed coding of choice, action and engagement across the mouse brain. *Nature* **576**, 266–273 (2019).
39. Esmaeili, V. *et al.* Rapid suppression and sustained activation of distinct cortical regions for a delayed sensory-triggered motor response. *Neuron* **109**, 2183-2201.e9 (2021).
40. Hanks, T. D. *et al.* Distinct relationships of parietal and prefrontal cortices to evidence accumulation. *Nature* **520**, 220–223 (2015).
41. Goard, M. J., Pho, G. N., Woodson, J. & Sur, M. Distinct roles of visual, parietal, and frontal motor cortices in memory-guided sensorimotor decisions. *eLife* **5**, e13764 (2016).

42. Peters, A. J., Fabre, J. M. J., Steinmetz, N. A., Harris, K. D. & Carandini, M. Striatal activity topographically reflects cortical activity. *Nature* 1–6 (2021) doi:10.1038/s41586-020-03166-8.
43. Oh, S. W. *et al.* A mesoscale connectome of the mouse brain. *Nature* **508**, 207–214 (2014).
44. Mahn, M. *et al.* High-efficiency optogenetic silencing with soma-targeted anion-conducting channelrhodopsins. *Nature Communications* **9**, 4125 (2018).
45. Guo, Z. V. *et al.* Flow of Cortical Activity Underlying a Tactile Decision in Mice. *Neuron* **81**, 179–194 (2014).
46. MacDowell, C. J. & Buschman, T. J. Low-Dimensional Spatiotemporal Dynamics Underlie Cortex-wide Neural Activity. *Current Biology* **30**, 2665-2680.e8 (2020).
47. Stringer, C. *et al.* Spontaneous behaviors drive multidimensional, brainwide activity. *Science* **364**, eaav7893 (2019).
48. Logothetis, N. K. *et al.* Hippocampal-cortical interaction during periods of subcortical silence. *Nature* **491**, 547–553 (2012).
49. Rogers, B. P., Morgan, V. L., Newton, A. T. & Gore, J. C. Assessing Functional Connectivity in the Human Brain by fMRI. *Magn Reson Imaging* **25**, 1347–1357 (2007).
50. Vanni, M. P. & Murphy, T. H. Mesoscale Transcranial Spontaneous Activity Mapping in GCaMP3 Transgenic Mice Reveals Extensive Reciprocal Connections between Areas of Somatomotor Cortex. *J. Neurosci.* **34**, 15931–15946 (2014).
51. Vanni, M. P., Chan, A. W., Balbi, M., Silasi, G. & Murphy, T. H. Mesoscale Mapping of Mouse Cortex Reveals Frequency-Dependent Cycling between Distinct Macroscale Functional Modules. *J. Neurosci.* **37**, 7513–7533 (2017).
52. Macé, É. *et al.* Whole-Brain Functional Ultrasound Imaging Reveals Brain Modules for Visuomotor Integration. *Neuron* **100**, 1241-1251.e7 (2018).

53. Matsui, T., Murakami, T. & Ohki, K. Transient neuronal coactivations embedded in globally propagating waves underlie resting-state functional connectivity. *PNAS* **113**, 6556–6561 (2016).
54. Huang, L. *et al.* BRICseq Bridges Brain-wide Interregional Connectivity to Neural Activity and Gene Expression in Single Animals. *Cell* **182**, 177-188.e27 (2020).
55. Mohajerani, M. H. *et al.* Spontaneous cortical activity alternates between motifs defined by regional axonal projections. *Nat Neurosci* **16**, 1426–1435 (2013).
56. Lohani, S. *et al.* Dual color mesoscopic imaging reveals spatiotemporally heterogeneous coordination of cholinergic and neocortical activity. 2020.12.09.418632  
<https://www.biorxiv.org/content/10.1101/2020.12.09.418632v1> (2020)  
doi:10.1101/2020.12.09.418632.
57. Gilad, A. & Helmchen, F. Spatiotemporal refinement of signal flow through association cortex during learning. *Nature Communications* **11**, 1–14 (2020).
58. Gallero-Salas, Y. *et al.* Sensory and Behavioral Components of Neocortical Signal Flow in Discrimination Tasks with Short-Term Memory. *Neuron* **109**, 135-148.e6 (2021).
59. Park, J. M. *et al.* Deep and superficial layers of the primary somatosensory cortex are critical for whisker-based texture discrimination in mice. *bioRxiv* 2020.08.12.245381 (2020)  
doi:10.1101/2020.08.12.245381.
60. Gilad, A., Gallero-Salas, Y., Groos, D. & Helmchen, F. Behavioral Strategy Determines Frontal or Posterior Location of Short-Term Memory in Neocortex. *Neuron* **99**, 814-828.e7 (2018).
61. Jun, E. J. *et al.* Causal role for the primate superior colliculus in the computation of evidence for perceptual decisions. *Nat Neurosci* (2021) doi:10.1038/s41593-021-00878-6.
62. Felsen, G. & Mainen, Z. F. Neural substrates of sensory-guided locomotor decisions in the rat superior colliculus. *Neuron* **60**, 137–148 (2008).

63. Wang, L., McAlonan, K., Goldstein, S., Gerfen, C. R. & Krauzlis, R. J. A Causal Role for Mouse Superior Colliculus in Visual Perceptual Decision-Making. *J. Neurosci.* **40**, 3768–3782 (2020).
64. Duan, C. A. *et al.* A cortico-collicular pathway for motor planning in a memory-dependent perceptual decision task. *Nature Communications* **12**, 2727 (2021).
65. Hwang, E. J. *et al.* Corticostriatal Flow of Action Selection Bias. *Neuron* (2019) doi:10.1016/j.neuron.2019.09.028.
66. Erlich, J. C., Bialek, M. & Brody, C. D. A Cortical Substrate for Memory-Guided Orienting in the Rat. *Neuron* **72**, 330–343 (2011).
67. Zátka-Haas, P., Steinmetz, N. A., Carandini, M. & Harris, K. D. Sensory coding and the causal impact of mouse cortex in a visual decision. *eLife* **10**, e63163 (2021).
68. Pinto, L. *et al.* Task-Dependent Changes in the Large-Scale Dynamics and Necessity of Cortical Regions. *Neuron* **104**, 810-824.e9 (2019).
69. Wu, Z. *et al.* Context-Dependent Decision Making in a Premotor Circuit. *Neuron* **106**, 316-328.e6 (2020).
70. Coen, P., Sit, T. P. H., Wells, M. J., Carandini, M. & Harris, K. D. *Mouse frontal cortex mediates additive multisensory decisions.* 2021.04.26.441250 <https://www.biorxiv.org/content/10.1101/2021.04.26.441250v2> (2021) doi:10.1101/2021.04.26.441250.
71. Park, J., Phillips, J. W., Martin, K. A., Hantman, A. W. & Dudman, J. T. *Descending neocortical output critical for skilled forelimb movements is distributed across projection cell classes.* 772517 <https://www.biorxiv.org/content/10.1101/772517v3> (2021) doi:10.1101/772517.
72. Znamenskiy, P. & Zador, A. M. Corticostriatal neurones in auditory cortex drive decisions during auditory discrimination. *Nature* **497**, 482–485 (2013).



73. Laboulaye, M. A., Duan, X., Qiao, M., Whitney, I. E. & Sanes, J. R. Mapping Transgene Insertion Sites Reveals Complex Interactions Between Mouse Transgenes and Neighboring Endogenous Genes. *Frontiers in Molecular Neuroscience* **11**, 385 (2018).
74. Ratzlaff, E. H. & Grinvald, A. A tandem-lens epifluorescence microscope: hundred-fold brightness advantage for wide-field imaging. *J. Neurosci. Methods* **36**, 127–137 (1991).
75. Lerner, T. N. *et al.* Intact-Brain Analyses Reveal Distinct Information Carried by SNc Dopamine Subcircuits. *Cell* **162**, 635–647 (2015).
76. Marshel, J. H., Garrett, M. E., Nauhaus, I. & Callaway, E. M. Functional Specialization of Seven Mouse Visual Cortical Areas. *Neuron* **72**, 1040–1054 (2011).
77. Chuong, A. S. *et al.* Noninvasive optical inhibition with a red-shifted microbial rhodopsin. *Nat Neurosci* **17**, 1123–1129 (2014).
78. Reddy, B. S. & Chatterji, B. N. An FFT-based technique for translation, rotation, and scale-invariant image registration. *IEEE Trans Image Process* **5**, 1266–1271 (1996).
79. Karabatsos, G. Marginal maximum likelihood estimation methods for the tuning parameters of ridge, power ridge, and generalized ridge regression. *Communications in Statistics - Simulation and Computation* (2017).
